# Supplementary material for: Horizontal Transmission of Stress Resistance Genes Shape the Ecology of Beta- and Gamma-Proteobacteria
Source: Front Microbiol. 2021 Jul 6;12:696522. doi: 10.3389/fmicb.2021.696522 (PMC8290217; doi:10.3389/fmicb.2021.696522)
Supplement: Supplementary file 3 [file Table_2.XLSX]

## Sheet: Sheet1
subject acc.	subject gi	subject sci names	subject tax ids	s. start	s. end		length	length 2
CP014763	1036430138	Klebsiella pneumoniae	573	283901	13078		-270823	270823
CP015117	1016892938	Pseudomonas aeruginosa	287	1825100	1857213		32113	32113
KY416992	1184136245	Escherichia coli	562	23649	54112		30463	30463
AP009385	189332915	Burkholderia multivorans ATCC 17616	395019	1025951	1001011		-24940	24940
CP000868	160340609	Burkholderia multivorans ATCC 17616	395019	2498822	2523762		24940	24940
CP033551	1527248031	Acinetobacter nosocomialis	106654	53597	32029		-21568	21568
LR134319	1539853939	Pseudomonas stutzeri	316	458246	479674		21428	21428
CP008870	1178040075	Pseudomonas aeruginosa	287	5173378	5193007		19629	19629
CP045739	1775210854	Pseudomonas aeruginosa	287	7159314	7139716		-19598	19598
LR536430	1593416567	Escherichia coli	562	3524178	3543680		19502	19502
CP022154	1213441078	Escherichia coli	562	4179353	4198845		19492	19492
CP056396	1880193582	Escherichia coli	562	2566683	2586164		19481	19481
CP056412	1879872088	Escherichia coli	562	4102540	4083059		-19481	19481
CP016838	1134531247	Salmonella enterica subsp. enterica serovar Senftenberg	28150	190579	209902		19323	19323
CP019195	1132479548	Salmonella enterica subsp. enterica serovar Senftenberg str. ATCC 43845	930772	296081	276760		-19321	19321
CP055565	1878685504	Citrobacter freundii	546	28541	47206		18665	18665
CP033758	1519006733	Klebsiella pneumoniae	573	76827	95488		18661	18661
CP052373	1837166251	Klebsiella pneumoniae	573	77292	95953		18661	18661
CP056645	1880451026	Citrobacter freundii	546	82400	63744		-18656	18656
CP012378	1226044079	Escherichia coli	562	4875639	4894293		18654	18654
CP056794	1880705748	Escherichia coli	562	4949869	4968523		18654	18654
CP056865	1880788976	Escherichia coli	562	5006751	5025405		18654	18654
CP028549	1723901935	Klebsiella variicola	244366	200832	182180		-18652	18652
CP042482	1758891920	Klebsiella pneumoniae	573	180093	161441		-18652	18652
CP031582	1450480360	Klebsiella pneumoniae	573	66169	47518		-18651	18651
CP032915	1567147425	Enterobacter roggenkampii	1812935	208409	189758		-18651	18651
CP003153	359353254	Azospira oryzae PS	640081	1552557	1570319		17762	17762
CP001644	240863652	Ralstonia pickettii 12D	428406	666457	648809		-17648	17648
LR590474	1639062328	Pseudomonas aeruginosa	287	5175943	5193512		17569	17569
CP011317	815968487	Pseudomonas aeruginosa	287	6300367	6283138		-17229	17229
CP011317	815968487	Pseudomonas aeruginosa	287	7466958	7449729		-17229	17229
CP016955	1176866288	Pseudomonas aeruginosa	287	30636	47865		17229	17229
CP016955	1176866288	Pseudomonas aeruginosa	287	1197296	1214525		17229	17229
CP011857	1044641851	Pseudomonas aeruginosa	287	5078624	5094966		16342	16342
CP026404	1338991911	Escherichia coli	562	3770	20112		16342	16342
CP030920	1432072108	Escherichia coli	562	168123	151781		-16342	16342
CP056627	1880056003	Escherichia coli	562	47929	31587		-16342	16342
LR134309	1539820548	Pseudomonas aeruginosa	287	5085420	5101762		16342	16342
CP013481	1110842695	Pandoraea apista	93218	924299	907959		-16340	16340
CP028899	1379589815	Stenotrophomonas maltophilia	40324	2952248	2968588		16340	16340
CP053618	1848970600	Achromobacter xylosoxidans	85698	1437406	1421066		-16340	16340
CP008857	974255378	Pseudomonas aeruginosa	287	2781089	2797428		16339	16339
CP039293	1621302673	Pseudomonas aeruginosa	287	5163920	5180259		16339	16339
CP033684	1518051430	Pseudomonas aeruginosa	287	5361109	5377447		16338	16338
CP039293	1621302673	Pseudomonas aeruginosa	287	3785190	3768852		-16338	16338
CP056092	1863261888	Pseudomonas aeruginosa	287	5383120	5399458		16338	16338
LR590472	1639041515	Pseudomonas aeruginosa	287	5093857	5110195		16338	16338
LT883143	1206262627	Pseudomonas aeruginosa C-NN2	910265	5195388	5211726		16338	16338
CP008864	1178020764	Pseudomonas aeruginosa	287	1595475	1579138		-16337	16337
CP009866	723239679	Pantoea sp. PSNIH2	1484157	1499968	1516305		16337	16337
CP011369	817624209	Pseudomonas aeruginosa	287	5189284	5205621		16337	16337
CP017420	1073960132	Delftia tsuruhatensis	180282	1460667	1477004		16337	16337
CP022525	1226080390	Pseudomonas aeruginosa	287	3577819	3561482		-16337	16337
CP026124	1335770838	Achromobacter sp. AONIH1	1758194	210499	194162		-16337	16337
CP029097	1384445591	Pseudomonas aeruginosa	287	1943236	1926899		-16337	16337
CP054473	1853450623	Pseudomonas aeruginosa	287	2072469	2056132		-16337	16337
CP056090	1863281039	Pseudomonas aeruginosa	287	3047844	3031507		-16337	16337
CP056102	1863261024	Pseudomonas aeruginosa	287	699546	683209		-16337	16337
CP010237	1114325982	Escherichia coli	562	146280	129944		-16336	16336
LR700248	1735417931	Pseudomonas aeruginosa	287	2279435	2295770		16335	16335
AP021908	1877246886	Stenotrophomonas maltophilia	40324	3756550	3740216		-16334	16334
CP022526	1226086870	Pseudomonas aeruginosa	287	2036778	2053112		16334	16334
CP033771	1519006927	Pseudomonas aeruginosa	287	3937780	3954114		16334	16334
CP041774	1709489567	Pseudomonas aeruginosa	287	5149748	5166082		16334	16334
CP046403	1866716373	Pseudomonas aeruginosa	287	5488494	5504828		16334	16334
CP033832	1519134079	Pseudomonas aeruginosa	287	6691923	6708256		16333	16333
CP009832	773022854	Burkholderia multivorans ATCC BAA-247	985079	1008638	992306		-16332	16332
CP020397	1370814252	Burkholderia multivorans	87883	992887	976555		-16332	16332
CP028330	1590366934	Pseudomonas aeruginosa	287	668529	684861		16332	16332
CP030861	1427055145	Pseudomonas aeruginosa	287	4149229	4132898		-16331	16331
CP010518	1384999897	Pandoraea apista	93218	3073514	3089844		16330	16330
CP011279	1385000134	Pandoraea apista	93218	3073514	3089844		16330	16330
CP011501	827413822	Pandoraea apista	93218	5047016	5063346		16330	16330
CP055935	1883300972	Escherichia coli	562	78648	94978		16330	16330
CP046069	1777167988	Pseudomonas aeruginosa	287	4991663	5007992		16329	16329
CP017353	1072789861	Pseudomonas aeruginosa	287	1085669	1101997		16328	16328
CP033546	1527246261	Acinetobacter nosocomialis	106654	6205	22421		16216	16216
CP028139	1573332104	Acinetobacter baumannii	470	96323	80114		-16209	16209
CP045916	1822095789	Pseudomonas aeruginosa	287	6767554	6751448		-16106	16106
CP003961	556072477	Pseudomonas sp. VLB120	69328	5614536	5598437		-16099	16099
CP059386	1880620189	Acinetobacter baumannii	470	3327079	3343177		16098	16098
AP022227	1877575224	Pseudomonas putida	303	5545211	5529118		-16093	16093
CP038259	1605167460	Acinetobacter baumannii	470	70631	54632		-15999	15999
CP017433	1073951170	Achromobacter ruhlandii	72557	5091183	5075297		-15886	15886
CP012046	874219584	Achromobacter xylosoxidans	85698	5276956	5261072		-15884	15884
CP040430	1777094965	Stenotrophomonas maltophilia	40324	2363606	2348111		-15495	15495
CP024134	1319610282	Escherichia coli	562	4031090	4046255		15165	15165
CP024155	1319589919	Escherichia coli	562	3982289	3997452		15163	15163
CP057276	1881386081	Escherichia coli	562	3677083	3692246		15163	15163
CP055543	1878741074	Citrobacter freundii	546	1846481	1831392		-15089	15089
CP056586	1879922082	Citrobacter freundii	546	1816605	1801516		-15089	15089
CP014608	1004380552	Obesumbacterium proteus	82983	2228591	2243679		15088	15088
CP017220	1172632399	Escherichia coli	562	336702	321617		-15085	15085
CP027109	1474570737	Cronobacter sakazakii	28141	674028	658947		-15081	15081
CP056118	1863302592	Enterobacter sp. DSM 30060	2747372	2153456	2168536		15080	15080
CP056235	1879656365	Citrobacter freundii	546	4040190	4055269		15079	15079
AP022126	1877467256	Enterobacter cloacae	550	1118581	1103504		-15077	15077
CP045064	1773202537	Enterobacter roggenkampii	1812935	1754056	1769133		15077	15077
CP055481	1878777319	Klebsiella sp. RHBSTW-00484	2742651	934653	949730		15077	15077
CP056483	1879893050	Klebsiella sp. RHBSTW-00464	2742649	934653	949730		15077	15077
CP056546	1880003272	Citrobacter sp. RHBSTW-00424	2742647	1198793	1183716		-15077	15077
CP009456	932123715	Yersinia enterocolitica	630	4066210	4051134		-15076	15076
CP011118	817363226	Yersinia enterocolitica	630	629473	644549		15076	15076
CP056277	1879757601	Klebsiella pneumoniae	573	17015	32089		15074	15074
CP055364	1878688745	Klebsiella grimontii	2058152	1586791	1601864		15073	15073
CP013940	973752559	Cronobacter malonaticus LMG 23826	1159491	3196525	3211596		15071	15071
HF571988	571260215	Yersinia enterocolitica (type O:5) str. YE53/03	1262462	804516	819587		15071	15071
AP014952	927668426	Klebsiella oxytoca	571	114135	129202		15067	15067
CP031582	1450480360	Klebsiella pneumoniae	573	28276	13209		-15067	15067
CP052373	1837166251	Klebsiella pneumoniae	573	115196	130263		15067	15067
CP032915	1567147425	Enterobacter roggenkampii	1812935	166642	151577		-15065	15065
AP021972	1877323208	Klebsiella sp. WP3-W18-ESBL-02	2675710	3989721	4004785		15064	15064
AP022020	1877360304	Klebsiella sp. WP3-S18-ESBL-05	2675711	3959343	3974407		15064	15064
CP024679	1491975918	Citrobacter freundii	546	370904	355840		-15064	15064
CP026056	1336530499	Citrobacter freundii	546	425089	410025		-15064	15064
CP047606	1798634882	Citrobacter sp. LUTT5	2697370	3857378	3872442		15064	15064
CP056505	1880227956	Citrobacter freundii	546	4058070	4073134		15064	15064
CP056527	1880237790	Citrobacter freundii	546	3852622	3867686		15064	15064
CP030919	1432067502	Escherichia coli	562	36018	20965		-15053	15053
CP056396	1880193582	Escherichia coli	562	4013640	4028692		15052	15052
CP027142	1353803396	Enterobacter hormaechei subsp. hoffmannii	1812934	3184198	3169149		-15049	15049
KY646173	1177219544	Escherichia coli	562	1	15049		15048	15048
CP026202	1335989880	Escherichia coli	562	1575233	1590259		15026	15026
CP020543	1173482665	Escherichia coli C	498388	3621428	3636448		15020	15020
CP024090	1275521620	Escherichia coli	562	3601093	3616113		15020	15020
CP025859	1538997266	Escherichia coli	562	3989716	3974696		-15020	15020
CP049050	1815787944	Escherichia coli	562	1757339	1742319		-15020	15020
CP054224	1861403979	Escherichia coli	562	3565827	3580847		15020	15020
LT906474	1231762938	Escherichia coli	562	3620503	3635523		15020	15020
CP010226	1114297796	Escherichia coli	562	3151056	3166075		15019	15019
CP010237	1114325982	Escherichia coli	562	760803	775822		15019	15019
CP020835	1184835202	Escherichia coli	562	3749271	3764290		15019	15019
CP022154	1213441078	Escherichia coli	562	4258363	4243344		-15019	15019
CP026399	1338986571	Escherichia coli	562	2069555	2084574		15019	15019
CP056412	1879872088	Escherichia coli	562	4022344	4037363		15019	15019
CP056625	1880051383	Escherichia coli	562	3870384	3885403		15019	15019
CP056794	1880705748	Escherichia coli	562	3834475	3849494		15019	15019
CP056865	1880788976	Escherichia coli	562	3856270	3871289		15019	15019
LR536430	1593416567	Escherichia coli	562	3637998	3622979		-15019	15019
LS483297	1403738069	Escherichia coli	562	3664437	3679456		15019	15019
CP054224	1861403979	Escherichia coli	562	60964	75968		15004	15004
CP002291	383101383	Escherichia coli P12b	910348	319828	304842		-14986	14986
CP010160	1114178669	Escherichia coli	562	3448595	3433609		-14986	14986
CP025739	1328144687	Escherichia coli	562	2533851	2518865		-14986	14986
LR134220	1539572809	Escherichia coli	562	3656363	3671349		14986	14986
LR134247	1539674388	Escherichia coli	562	3878673	3893659		14986	14986
LS483296	1403733617	Escherichia coli	562	3668385	3683371		14986	14986
CP058913	1877756670	Escherichia coli	562	2776997	2762012		-14985	14985
LR134152	1539390012	Escherichia coli	562	3641055	3656039		14984	14984
CP010169	1114191980	Escherichia coli	562	1147407	1132428		-14979	14979
CP010170	1114196516	Escherichia coli	562	209923	224902		14979	14979
LR536431	1593416568	Escherichia coli	562	68696	83667		14971	14971
CP055918	1883271649	Escherichia coli	562	1148785	1163755		14970	14970
LR134252	1539683477	Raoultella terrigena	577	148837	163786		14949	14949
CP026536	1566427537	Enterobacter cloacae	550	3307664	3322513		14849	14849
CP028538	1493320595	Enterobacter hormaechei	158836	3537364	3552204		14840	14840
CP058187	1879053419	Enterobacter hormaechei	158836	3534625	3549465		14840	14840
LR134485	1540175524	Citrobacter youngae	133448	1156110	1141270		-14840	14840
CP026231	1340258836	Citrobacter freundii complex sp. CFNIH4	2077148	415409	400650		-14759	14759
CP027140	1353798850	Escherichia coli	562	1072994	1087703		14709	14709
CP055608	1878627396	Escherichia coli	562	1068625	1053916		-14709	14709
CP057163	1881261000	Escherichia coli	562	3800018	3814709		14691	14691
CP000284	91708343	Methylobacillus flagellatus KT	265072	1216501	1201833		-14668	14668
CP042556	1758866041	Acinetobacter baumannii	470	2134734	2149380		14646	14646
CP031851	1621565694	Klebsiella pneumoniae	573	28928	43023		14095	14095
CP010179	1114223958	Escherichia coli	562	71961	86053		14092	14092
CP056647	1880441454	Citrobacter sp. RHBSTW-00229	2742641	539580	525488		-14092	14092
CP058175	1879039429	Enterobacter hormaechei	158836	441359	427267		-14092	14092
KY887595	1212329962	Escherichia coli	562	160435	174527		14092	14092
CP055991	1883276282	Klebsiella grimontii	2058152	3292101	3306191		14090	14090
CP058167	1879026715	Enterobacter hormaechei	158836	476597	462507		-14090	14090
CP041936	1712829777	Klebsiella pneumoniae	573	65265	79354		14089	14089
LT629783	1085982851	Pseudomonas fragi	296	3214907	3200818		-14089	14089
CP056127	1880580582	Enterobacter asburiae	61645	16342	30429		14087	14087
CP056149	1879747891	Enterobacter roggenkampii	1812935	132649	118562		-14087	14087
CP017181	1067038464	Enterobacter kobei	208224	4148981	4134895		-14086	14086
CP043562	1736642655	Klebsiella pneumoniae	573	4356063	4370148		14085	14085
CP056373	1879849830	Klebsiella pneumoniae	573	144490	158574		14084	14084
CP056568	1880268109	Klebsiella oxytoca	571	36648	50732		14084	14084
FR714908	308827057	Cronobacter sakazakii	28141	2898	16981		14083	14083
CP055460	1878794063	Enterobacter cloacae	550	25288	39370		14082	14082
CP056664	1879978261	Enterobacter hormaechei	158836	23296	37378		14082	14082
CP056678	1879951271	Enterobacter hormaechei	158836	32300	46382		14082	14082
CP056708	1880207300	Enterobacter hormaechei	158836	15005	29087		14082	14082
CP031939	1540330417	Klebsiella pneumoniae	573	61860	75941		14081	14081
CP056683	1879855740	Klebsiella grimontii	2058152	40065	54146		14081	14081
CP011047	816219578	Cronobacter sakazakii	28141	4460319	4474399		14080	14080
CP055554	1878716758	Klebsiella pneumoniae	573	81189	95269		14080	14080
CP056426	1879877344	Klebsiella pneumoniae	573	71676	85756		14080	14080
CP043515	1736216504	Enterobacter kobei	208224	72242	58163		-14079	14079
CP056712	1879997972	Enterobacter asburiae	61645	228679	214600		-14079	14079
CP056721	1879932025	Enterobacter hormaechei	158836	108695	94616		-14079	14079
CP011623	828952515	Klebsiella pneumoniae	573	148553	134475		-14078	14078
CP056201	1880561139	Citrobacter sp. RHBSTW-00986	2742675	20621	34699		14078	14078
CP032169	1476600870	Klebsiella pneumoniae	573	120686	106609		-14077	14077
CP055452	1878806436	Klebsiella pneumoniae	573	64813	50736		-14077	14077
CP056531	1879915824	Klebsiella pneumoniae	573	77426	63349		-14077	14077
LR134229	1539611098	Raoultella ornithinolytica	54291	133965	148037		14072	14072
CP055884	1878842113	Enterobacter sp. RHBSTW-00975	2742673	24879	10808		-14071	14071
CP056137	1879833150	Klebsiella michiganensis	1134687	53569	39500		-14069	14069
CP056442	1880216937	Enterobacter cloacae	550	120518	106450		-14068	14068
CP056748	1880065568	Enterobacter hormaechei	158836	89728	75660		-14068	14068
CP058158	1878929092	Enterobacter hormaechei	158836	102890	88822		-14068	14068
CP008907	682117452	Enterobacter hormaechei subsp. hoffmannii ECR091	1333849	26959	12892		-14067	14067
CP055405	1878659982	Enterobacter hormaechei	158836	41355	55422		14067	14067
CP055996	1883296448	Enterobacter roggenkampii	1812935	99639	85572		-14067	14067
CP056456	1880095535	Enterobacter hormaechei	158836	104915	90848		-14067	14067
CP056561	1880257870	Enterobacter cloacae	550	130948	116881		-14067	14067
CP056692	1879861051	Enterobacter hormaechei	158836	98401	84334		-14067	14067
CP058150	1878918606	Enterobacter hormaechei	158836	104915	90848		-14067	14067
CP058192	1879064027	Enterobacter hormaechei	158836	134221	120154		-14067	14067
AP022079	1877422257	Klebsiella pneumoniae	573	34212	20147		-14065	14065
CP056669	1879844492	Klebsiella oxytoca	571	89332	103397		14065	14065
CP019840	1150442879	Enterobacter roggenkampii	1812935	30833	44897		14064	14064
CP022824	1236391172	Klebsiella quasivariicola	2026240	65250	79314		14064	14064
CP023875	1266950011	Raoultella planticola	575	130810	116746		-14064	14064
CP023879	1266955561	Raoultella planticola	575	116684	130748		14064	14064
CP026397	1339013836	Klebsiella pneumoniae	573	192163	206227		14064	14064
CP028549	1723901935	Klebsiella variicola	244366	88915	102979		14064	14064
CP056386	1879866205	Klebsiella pneumoniae	573	85197	99261		14064	14064
KX839208	1212889550	Klebsiella pneumoniae	573	126390	112326		-14064	14064
LR134219	1539572606	Klebsiella pneumoniae	573	77629	63565		-14064	14064
CP055510	1878776431	Klebsiella pneumoniae	573	68632	54569		-14063	14063
CP055518	1878764082	Klebsiella pneumoniae	573	85179	99242		14063	14063
CP055936	1883301228	Escherichia coli	562	43076	57139		14063	14063
CP056151	1879782638	Klebsiella grimontii	2058152	87508	73445		-14063	14063
CP056192	1880571006	Klebsiella pneumoniae	573	74134	88197		14063	14063
CP056308	1879812234	Klebsiella pneumoniae	573	85398	99461		14063	14063
CP056454	1880505417	Klebsiella oxytoca	571	53610	67673		14063	14063
CP056540	1879921505	Klebsiella oxytoca	571	134916	120853		-14063	14063
CP056855	1880783435	Klebsiella pneumoniae	573	78825	92888		14063	14063
CP058132	1878906342	Klebsiella quasipneumoniae	1463165	141828	155891		14063	14063
LR607342	1700446147	Klebsiella michiganensis	1134687	5792280	5778217		-14063	14063
CP007734	640855842	Klebsiella pneumoniae subsp. pneumoniae KPNIH27	1328324	193539	207601		14062	14062
CP026975	1346230747	Enterobacter cloacae complex sp.	2027919	2570891	2556829		-14062	14062
CP056169	1879941322	Enterobacter roggenkampii	1812935	193998	179936		-14062	14062
CP056433	1879882758	Klebsiella pneumoniae	573	120066	134128		14062	14062
CP023417	1468764350	Klebsiella pneumoniae	573	63366	49309		-14057	14057
CP055565	1878685504	Citrobacter freundii	546	226981	212926		-14055	14055
CP056246	1879693519	Citrobacter freundii	546	86511	72456		-14055	14055
CP056645	1880451026	Citrobacter freundii	546	191818	177763		-14055	14055
CP033798	1518966356	Enterobacter roggenkampii	1812935	50084	64082		13998	13998
CP056767	1879973249	Enterobacter cloacae	550	147821	133827		-13994	13994
CP055317	1878800803	Klebsiella grimontii	2058152	80291	66310		-13981	13981
CP056757	1880090663	Enterobacter hormaechei	158836	55348	41395		-13953	13953
CP021347	1199168556	Acinetobacter baumannii	470	3373306	3359464		-13842	13842
CP051862	1835696042	Acinetobacter baumannii	470	1879507	1893349		13842	13842
JX424424	410475189	Klebsiella pneumoniae	573	64237	77861		13624	13624
CP026538	1566432249	Desulfovibrio carbinolicus	296842	1391367	1404883		13516	13516
CP040431	1777120115	Stenotrophomonas maltophilia	40324	2348643	2335142		-13501	13501
CP040433	1777107598	Stenotrophomonas maltophilia	40324	2364456	2350955		-13501	13501
CP040440	1777136989	Stenotrophomonas maltophilia	40324	2557267	2570767		13500	13500
CP008873	984361056	Pseudomonas aeruginosa	287	3151196	3137755		-13441	13441
CP026222	1335892591	Aeromonas sp. ASNIH3	1636608	1211043	1224484		13441	13441
CP008865	1178021311	Pseudomonas aeruginosa	287	5181358	5194797		13439	13439
CP008866	1178022191	Pseudomonas aeruginosa	287	5028223	5041662		13439	13439
CP008871	1178041769	Pseudomonas aeruginosa	287	5169538	5182976		13438	13438
CP029759	1680492583	Stenotrophomonas sp. pho	2211160	2274030	2260612		-13418	13418
CP038263	1605163811	Acinetobacter baumannii	470	24805	11391		-13414	13414
CP056553	1880247657	Enterobacter sp. RHBSTW-00422	2742646	111559	124843		13284	13284
CP055418	1878832810	Citrobacter sp. RHBSTW-00944	2742671	4366603	4353451		-13152	13152
CP056177	1879946417	Enterobacter roggenkampii	1812935	7998	21149		13151	13151
CP056464	1879888320	Enterobacter cloacae	550	7998	21149		13151	13151
CP056497	1879905085	Klebsiella oxytoca	571	71093	84244		13151	13151
CP056647	1880441454	Citrobacter sp. RHBSTW-00229	2742641	4439106	4425955		-13151	13151
CP044528	1757409459	Klebsiella grimontii	2058152	89968	103115		13147	13147
CP048383	1806845948	Citrobacter freundii	546	166833	179980		13147	13147
CP056155	1879792252	Enterobacter hormaechei	158836	622201	635348		13147	13147
CP056200	1880556524	Citrobacter sp. RHBSTW-00986	2742675	1217415	1204268		-13147	13147
CP056644	1880446507	Citrobacter freundii	546	3643275	3656422		13147	13147
CP056761	1880085718	Klebsiella grimontii	2058152	74601	87748		13147	13147
CP057147	1881215048	Citrobacter sp. RHB35-C21	2742626	649706	662853		13147	13147
CP058113	1878889724	Klebsiella grimontii	2058152	74601	87748		13147	13147
CP058181	1879051494	Klebsiella grimontii	2058152	43869	57016		13147	13147
CP055906	1883255700	Citrobacter freundii	546	3941894	3928748		-13146	13146
CP056703	1879871844	Klebsiella grimontii	2058152	29974	16830		-13144	13144
LR607341	1700446146	Klebsiella grimontii	2058152	6846079	6832935		-13144	13144
CP058196	1879065474	Enterobacter roggenkampii	1812935	3786560	3773418		-13142	13142
CP058173	1879037301	Enterobacter hormaechei	158836	30165	17036		-13129	13129
CP011587	828921812	Enterobacter asburiae	61645	39671	26543		-13128	13128
CP055355	1878733001	Enterobacter hormaechei	158836	10547	23675		13128	13128
CP055399	1878678889	Enterobacter roggenkampii	1812935	31867	18739		-13128	13128
CP056133	1879688816	Enterobacter hormaechei	158836	11868	24996		13128	13128
CP056730	1880040208	Enterobacter hormaechei	158836	23093	36221		13128	13128
CP056738	1880045283	Enterobacter roggenkampii	1812935	23942	10814		-13128	13128
CP056743	1880060930	Enterobacter hormaechei	158836	26784	13656		-13128	13128
CP058154	1878924199	Enterobacter hormaechei	158836	22807	9679		-13128	13128
CP058161	1878934227	Enterobacter hormaechei	158836	22807	9679		-13128	13128
CP059418	1881778231	Enterobacter hormaechei	158836	109371	122499		13128	13128
LT576116	1075531934	Klebsiella pneumoniae	573	13130	2		-13128	13128
CP027664	1364830652	Pseudomonas stutzeri	316	2683175	2670062		-13113	13113
CP027477	1376590111	Pseudomonas koreensis	198620	5296185	5309229		13044	13044
CP050322	1854615033	Pseudomonas aeruginosa	287	2545814	2558712		12898	12898
CP002881	338799449	Pseudomonas stutzeri	316	4512210	4499313		-12897	12897
CP002622	327478612	Pseudomonas stutzeri DSM 4166	996285	2625990	2613110		-12880	12880
CP023641	1250071859	Pseudomonas mendocina	300	2532627	2545472		12845	12845
CP040862	1809136934	Klebsiella pneumoniae	573	1	12813		12812	12812
CP031606	1450482331	Pseudomonas sp. phDV1	253237	1801268	1813998		12730	12730
HG916826	582002523	Pseudomonas pseudoalcaligenes CECT 5344	1182590	1726909	1739282		12373	12373
LK391695	652789639	Pseudomonas oleovorans	301	1734371	1746744		12373	12373
CP000514	120322793	Marinobacter hydrocarbonoclasticus VT8	351348	3759586	3747237		-12349	12349
CP024507	1274827564	Klebsiella pneumoniae	573	192841	180492		-12349	12349
CP026186	1336001636	Klebsiella pneumoniae	573	16024	3675		-12349	12349
CP010799	770603614	Ralstonia mannitolilytica	105219	376634	388881		12247	12247
AP021917	1877261039	Aeromonas sp. WP2-W18-CRE-05	2675707	2223952	2236131		12179	12179
CP049132	1815837179	Ralstonia mannitolilytica	105219	765487	777665		12178	12178
CP010171	1114201056	Escherichia coli	562	1808394	1820561		12167	12167
CP026206	1335994990	Escherichia coli	562	56684	68793		12109	12109
CP056396	1880193582	Escherichia coli	562	1796835	1808944		12109	12109
LR536431	1593416568	Escherichia coli	562	2667963	2655854		-12109	12109
CP049132	1815837179	Ralstonia mannitolilytica	105219	3113242	3125242		12000	12000
CP056100	1863287758	Pseudomonas aeruginosa	287	7015947	7004186		-11761	11761
CP007511	747149133	Pseudomonas balearica DSM 6083	1123016	4361473	4349722		-11751	11751
CP045858	1820111928	Pseudomonas balearica	74829	630706	642455		11749	11749
CP022151	1213435705	Citrobacter freundii	546	3708839	3697596		-11243	11243
CP016838	1134531247	Salmonella enterica subsp. enterica serovar Senftenberg	28150	134930	146170		11240	11240
CP050323	1854623666	Pseudomonas aeruginosa	287	2165904	2154890		-11014	11014
CP014065	1342688936	Achromobacter xylosoxidans	85698	2067219	2056239		-10980	10980
CP044357	1755152990	Acinetobacter baumannii	470	16732	5809		-10923	10923
AP018825	1435235234	Acinetobacter ursingii	108980	55434	44693		-10741	10741
CP028162	1373031773	Pseudomonas aeruginosa	287	5371986	5382516		10530	10530
CP019195	1132479548	Salmonella enterica subsp. enterica serovar Senftenberg str. ATCC 43845	930772	10454	3		-10451	10451
CP010799	770603614	Ralstonia mannitolilytica	105219	1608279	1597905		-10374	10374
CP028425	1378030999	Zoogloeaceae bacteirum Par-f-2	2080469	2267270	2256896		-10374	10374
AP021844	1751365750	Azospira sp. I09	1765049	2851395	2861764		10369	10369
CP054626	1858332805	Cupriavidus gilardii	82541	816538	826879		10341	10341
CP002657	329308025	Alicycliphilus denitrificans K601	596154	2160119	2149785		-10334	10334
CP010516	927304885	Cupriavidus gilardii CR3	1267562	811955	822281		10326	10326
CP056366	1879983340	Citrobacter freundii	546	26092	36401		10309	10309
CP056586	1879922082	Citrobacter freundii	546	2326092	2336401		10309	10309
CP056476	1879892971	Enterobacter cloacae	550	16338	26646		10308	10308
AP021919	1877265526	Aeromonas sp. WP2-W18-CRE-05	2675707	47	10321		10274	10274
AP022019	1877360262	Klebsiella quasipneumoniae	1463165	10973	21247		10274	10274
CP012378	1226044079	Escherichia coli	562	3894879	3905045		10166	10166
LR134236	1539640477	Escherichia coli	562	1271210	1261308		-9902	9902
CP028569	1377522623	Acinetobacter pittii	48296	106831	116711		9880	9880
CP021133	1190843182	Pseudomonas fragi	296	70271	79891		9620	9620
CP025706	1420215616	Aeromonas caviae	648	1776761	1786356		9595	9595
CP025777	1420230517	Aeromonas caviae	648	3762427	3752832		-9595	9595
CP007004	584468738	Vibrio parahaemolyticus UCM-V493	1429044	773706	783283		9577	9577
CP013712	970338390	Klebsiella pneumoniae	573	33334	24158		-9176	9176
CP017433	1073951170	Achromobacter ruhlandii	72557	4851845	4842699		-9146	9146
CP040430	1777094965	Stenotrophomonas maltophilia	40324	2347784	2338641		-9143	9143
AP023265	1866589579	Klebsiella pneumoniae	573	99443	90388		-9055	9055
CP033769	1518966189	Acinetobacter baumannii	470	34176	43140		8964	8964
CP042210	1714623696	Acinetobacter baumannii	470	111483	120444		8961	8961
KF719970	575010104	Klebsiella pneumoniae	573	8650	17521		8871	8871
LT883141	1293094017	Escherichia coli	562	100716	91951		-8765	8765
CP022148	1213431012	Enterobacter roggenkampii	1812935	1592638	1583885		-8753	8753
CP022149	1213435529	Enterobacter roggenkampii	1812935	96111	104864		8753	8753
CP013323	959190086	Klebsiella pneumoniae	573	156101	147350		-8751	8751
CP030327	1418472143	Pseudomonas aeruginosa	287	4626609	4617992		-8617	8617
CP017074	1060916168	Luteimonas sp. JM171	1896164	2729611	2721060		-8551	8551
CP020121	1162911661	Comamonas kerstersii	225992	3098811	3107249		8438	8438
CP006731	564116047	Cronobacter malonaticus	413503	3399710	3408130		8420	8420
CP028800	1723902757	Acinetobacter junii	40215	884975	893294		8319	8319
CP018332	1253256794	Acinetobacter baumannii	470	2807655	2799345		-8310	8310
CP010163	1114183222	Escherichia coli	562	3324548	3317397		-7151	7151
CP019280	1339534175	Escherichia coli	562	805031	812182		7151	7151
CP023377	1243341739	Escherichia coli	562	3262628	3255477		-7151	7151
CP006731	564116047	Cronobacter malonaticus	413503	3344462	3351119		6657	6657
CP056752	1880070380	Enterobacter hormaechei	158836	1	6657		6656	6656
CP056752	1880070380	Enterobacter hormaechei	158836	51632	58103		6471	6471
AP022144	1877487425	Klebsiella quasipneumoniae	1463165	17257	23683		6426	6426
CP028952	1382830700	Klebsiella aerogenes	548	309233	315659		6426	6426
CP030859	1444913017	Klebsiella pneumoniae subsp. pneumoniae	72407	198445	192019		-6426	6426
CP031563	1567146573	Klebsiella pneumoniae	573	65832	72258		6426	6426
CP042858	1817307866	Klebsiella pneumoniae	573	4771011	4764585		-6426	6426
CP045194	1797072373	Klebsiella pneumoniae	573	41395	47821		6426	6426
CP046613	1784292600	Klebsiella pneumoniae	573	148043	141617		-6426	6426
CP050836	1829075863	Klebsiella pneumoniae	573	32947	26521		-6426	6426
MK773537	1773845861	Klebsiella pneumoniae	573	38955	45381		6426	6426
MN657245	1806595393	Enterobacteriaceae bacterium	1849603	13117	6816		-6301	6301
MN657246	1806595450	Enterobacteriaceae bacterium	1849603	13154	6853		-6301	6301
CP000112	78217452	Desulfovibrio alaskensis G20	207559	3371705	3377913		6208	6208
CP025577	1552089572	Klebsiella pneumoniae	573	72582	78692		6110	6110
CP042521	1758977955	Klebsiella pneumoniae	573	51424	45318		-6106	6106
CP022920	1482830873	Klebsiella pneumoniae	573	158125	164226		6101	6101
CP028817	1378749289	Klebsiella pneumoniae	573	97031	103132		6101	6101
CP034282	1532644201	Klebsiella pneumoniae	573	65629	71730		6101	6101
CP036307	1584040503	Klebsiella pneumoniae	573	133322	139423		6101	6101
CP038004	1600748009	Klebsiella pneumoniae	573	133322	139423		6101	6101
CP048380	1806851780	Klebsiella variicola	244366	79605	85706		6101	6101
CP052173	1837009981	Klebsiella pneumoniae	573	157987	164088		6101	6101
CP052209	1837596316	Klebsiella pneumoniae	573	106312	112413		6101	6101
CP052266	1837074443	Klebsiella pneumoniae	573	147821	153922		6101	6101
CP052296	1837101055	Klebsiella pneumoniae	573	147821	153922		6101	6101
CP052302	1837069099	Klebsiella pneumoniae	573	159059	165160		6101	6101
CP052570	1837350754	Klebsiella pneumoniae	573	158866	164967		6101	6101
CP056419	1880222591	Klebsiella oxytoca	571	9398	15499		6101	6101
KY271404	1194429042	Klebsiella pneumoniae	573	102695	108796		6101	6101
KY271405	1194429181	Klebsiella pneumoniae	573	44386	50487		6101	6101
LR607350	1700446155	Klebsiella oxytoca	571	6220084	6226185		6101	6101
LT968747	1518649399	Klebsiella pneumoniae	573	30986	37087		6101	6101
AP021970	1877322888	Raoultella ornithinolytica	54291	178608	172510		-6098	6098
AP022158	1877492705	Klebsiella pneumoniae	573	101211	95113		-6098	6098
CP022917	1482825525	Klebsiella pneumoniae	573	9908	3810		-6098	6098
CP022923	1482872147	Klebsiella pneumoniae	573	28408	22310		-6098	6098
CP022926	1482877426	Klebsiella pneumoniae	573	110167	104069		-6098	6098
CP023937	1266994056	Klebsiella pneumoniae	573	126391	120293		-6098	6098
CP023947	1267005365	Klebsiella pneumoniae	573	25062	31160		6098	6098
CP024483	1274788024	Klebsiella pneumoniae	573	63697	57599		-6098	6098
CP024489	1274788346	Klebsiella pneumoniae	573	5208924	5202826		-6098	6098
CP024500	1274803888	Klebsiella pneumoniae	573	63697	57599		-6098	6098
CP024508	1274827902	Klebsiella pneumoniae	573	65980	59882		-6098	6098
CP024516	1274836800	Klebsiella pneumoniae	573	63697	57599		-6098	6098
CP025457	1317752653	Klebsiella pneumoniae	573	71855	65757		-6098	6098
CP026716	1344865570	Klebsiella oxytoca	571	141560	135462		-6098	6098
CP027425	1356855143	Klebsiella oxytoca	571	134876	128778		-6098	6098
CP034326	1534488382	Klebsiella pneumoniae	573	97621	91523		-6098	6098
CP039952	1864181149	Klebsiella pneumoniae	573	63835	57737		-6098	6098
CP039955	1864186498	Klebsiella pneumoniae	573	63835	57737		-6098	6098
CP040862	1809136934	Klebsiella pneumoniae	573	215014	208916		-6098	6098
CP052140	1837502084	Klebsiella pneumoniae	573	63835	57737		-6098	6098
CP052148	1837478297	Klebsiella pneumoniae	573	63835	57737		-6098	6098
CP052151	1837020692	Klebsiella pneumoniae	573	86346	80248		-6098	6098
CP052176	1837470351	Klebsiella pneumoniae	573	86309	80211		-6098	6098
CP052237	1837026391	Klebsiella pneumoniae	573	63835	57737		-6098	6098
CP052243	1837015577	Klebsiella pneumoniae	573	63835	57737		-6098	6098
CP052270	1837607168	Klebsiella pneumoniae	573	63835	57737		-6098	6098
CP052279	1837004690	Klebsiella pneumoniae	573	84285	78187		-6098	6098
CP052337	1837138566	Klebsiella pneumoniae	573	63824	57726		-6098	6098
CP052370	1837171491	Klebsiella pneumoniae	573	63835	57737		-6098	6098
CP052387	1837181770	Klebsiella pneumoniae	573	65042	58944		-6098	6098
CP052441	1837176747	Klebsiella pneumoniae	573	63835	57737		-6098	6098
CP052485	1837257959	Klebsiella pneumoniae	573	63835	57737		-6098	6098
CP052499	1837285269	Klebsiella pneumoniae	573	63835	57737		-6098	6098
CP052506	1837301340	Klebsiella pneumoniae	573	63835	57737		-6098	6098
CP052511	1837181935	Klebsiella pneumoniae	573	63834	57736		-6098	6098
CP052534	1837306788	Klebsiella pneumoniae	573	76340	70242		-6098	6098
CP052559	1837345510	Klebsiella pneumoniae	573	63835	57737		-6098	6098
CP052561	1837333937	Klebsiella pneumoniae	573	63835	57737		-6098	6098
CP052572	1837366384	Klebsiella pneumoniae	573	63835	57737		-6098	6098
CP052575	1837387664	Klebsiella pneumoniae	573	63835	57737		-6098	6098
CP052586	1837382203	Klebsiella pneumoniae	573	63835	57737		-6098	6098
CP052597	1837393244	Klebsiella pneumoniae	573	63835	57737		-6098	6098
CP052609	1837376773	Klebsiella pneumoniae	573	63835	57737		-6098	6098
CP052707	1837443145	Klebsiella pneumoniae	573	63834	57736		-6098	6098
CP052717	1837459851	Klebsiella pneumoniae	573	63834	57736		-6098	6098
CP052729	1837448881	Klebsiella pneumoniae	573	63835	57737		-6098	6098
CP055992	1883281803	Klebsiella grimontii	2058152	63172	57074		-6098	6098
CP056302	1879801701	Klebsiella pneumoniae	573	81698	75600		-6098	6098
KY271406	1194429262	Klebsiella pneumoniae	573	157229	151131		-6098	6098
MG764551	1384661752	Klebsiella pneumoniae	573	90297	84199		-6098	6098
MH745929	1486391055	Klebsiella pneumoniae	573	63835	57737		-6098	6098
MK036889	1655687489	Klebsiella pneumoniae	573	89178	83080		-6098	6098
CP040176	1649191359	Klebsiella pneumoniae	573	241519	235422		-6097	6097
CP049605	1819734460	Klebsiella pneumoniae	573	137237	131140		-6097	6097
CP041949	1779248515	Klebsiella pneumoniae	573	44719	38623		-6096	6096
LT968720	1518649259	Klebsiella pneumoniae	573	1898	7993		6095	6095
JX430448	440685606	Klebsiella pneumoniae	573	32381	38475		6094	6094
KF719972	575010525	Klebsiella pneumoniae	573	8650	14743		6093	6093
LR130540	1552475654	Klebsiella variicola	244366	63780	57687		-6093	6093
CP002474	356596024	Klebsiella pneumoniae	573	8650	14742		6092	6092
CP006657	530347473	Klebsiella pneumoniae JM45	1380908	168391	174483		6092	6092
CP006927	595631238	Klebsiella pneumoniae 30660/NJST258_1	1420012	26989	33081		6092	6092
CP007729	640850291	Klebsiella pneumoniae subsp. pneumoniae KPNIH1;Klebsiella pneumoniae subsp. pneumoniae KPNIH10	1087440;1094170	74407	80499		6092	6092
CP008800	660582341	Klebsiella pneumoniae subsp. pneumoniae KPNIH24	1225181	61947	68039		6092	6092
CP008930	695177276	Klebsiella pneumoniae	573	72547	78639		6092	6092
CP009777	717159529	Klebsiella pneumoniae subsp. pneumoniae	72407	27659	33751		6092	6092
CP010393	742999547	Klebsiella pneumoniae	573	32526	38618		6092	6092
CP010574	754341644	Klebsiella pneumoniae	573	16840	22932		6092	6092
CP011577	828905996	Klebsiella pneumoniae	573	7970	14062		6092	6092
CP011977	902611358	Klebsiella pneumoniae DMC1097	1284798	65353	71445		6092	6092
CP011981	902604188	Klebsiella pneumoniae 500_1420	1304922	31930	38022		6092	6092
CP011990	902625122	Klebsiella pneumoniae UHKPC33	1284802	117511	123603		6092	6092
CP012567	1062713699	Klebsiella pneumoniae	573	133831	139923		6092	6092
CP018355	1114568966	Klebsiella pneumoniae	573	179485	185577		6092	6092
CP018365	1114601939	Klebsiella pneumoniae	573	63660	69752		6092	6092
CP018424	1114545844	Klebsiella pneumoniae	573	33207	39299		6092	6092
CP018430	1114557136	Klebsiella pneumoniae	573	33207	39299		6092	6092
CP018434	1114557453	Klebsiella pneumoniae	573	33207	39299		6092	6092
CP018693	1120794933	Klebsiella pneumoniae	573	89721	95813		6092	6092
CP020069	1163055146	Klebsiella pneumoniae	573	188679	194771		6092	6092
CP020109	1163071799	Klebsiella pneumoniae	573	155768	161860		6092	6092
CP020499	1373539815	Klebsiella pneumoniae	573	36016	42108		6092	6092
CP020855	1196624992	Klebsiella pneumoniae	573	133646	139738		6092	6092
CP020903	1187402967	Klebsiella pneumoniae	573	32499	38591		6092	6092
CP021856	1207892535	Klebsiella pneumoniae	573	28305	34397		6092	6092
CP023943	1266999959	Klebsiella pneumoniae	573	52769	58861		6092	6092
CP023953	1267011127	Klebsiella pneumoniae	573	180338	186430		6092	6092
CP025038	1293355025	Klebsiella pneumoniae	573	96432	102524		6092	6092
CP025142	1304501834	Klebsiella pneumoniae	573	107995	114087		6092	6092
CP025145	1304512935	Klebsiella pneumoniae	573	104923	111015		6092	6092
CP025148	1304507381	Klebsiella pneumoniae	573	117751	123843		6092	6092
CP026155	1564265810	Klebsiella pneumoniae	573	2826984	2833076		6092	6092
CP026752	1345403935	Klebsiella pneumoniae	573	38870	44962		6092	6092
CP027037	1530750719	Klebsiella pneumoniae	573	91639	97731		6092	6092
CP027044	1530771470	Klebsiella pneumoniae	573	122250	128342		6092	6092
CP027049	1530745209	Klebsiella pneumoniae	573	27782	33874		6092	6092
CP027054	1530765141	Klebsiella pneumoniae	573	49049	55141		6092	6092
CP027152	1353814013	Klebsiella pneumoniae	573	184452	190544		6092	6092
CP028804	1735336444	Klebsiella pneumoniae	573	120186	126278		6092	6092
CP029136	1384494350	Klebsiella pneumoniae	573	62678	68770		6092	6092
CP029591	1393936685	Klebsiella pneumoniae	573	95539	101631		6092	6092
CP030343	1418442280	Klebsiella pneumoniae	573	38160	44252		6092	6092
CP032186	1476622128	Klebsiella pneumoniae	573	90813	96905		6092	6092
CP036188	1580101915	Klebsiella pneumoniae	573	19366	25458		6092	6092
CP036443	1585107930	Klebsiella pneumoniae	573	69879	75971		6092	6092
CP039803	1805564700	Klebsiella pneumoniae	573	80555	86647		6092	6092
CP041928	1727585521	Klebsiella pneumoniae	573	40522	46614		6092	6092
CP043049	1731522652	Klebsiella pneumoniae	573	121827	127919		6092	6092
CP043860	1802492341	Klebsiella pneumoniae	573	44756	50848		6092	6092
CP050374	1826578215	Klebsiella pneumoniae	573	40029	46121		6092	6092
CP050379	1826583487	Klebsiella pneumoniae	573	49628	55720		6092	6092
CP050457	1826700552	Klebsiella pneumoniae	573	109607	115699		6092	6092
CP052469	1837274027	Klebsiella pneumoniae	573	31793	37885		6092	6092
CP052504	1837295877	Klebsiella pneumoniae	573	157193	163285		6092	6092
CP052521	1837290566	Klebsiella pneumoniae	573	157386	163478		6092	6092
CP052523	1837160379	Klebsiella pneumoniae	573	157386	163478		6092	6092
CP054265	1851168216	Klebsiella pneumoniae	573	97413	103505		6092	6092
CP056831	1880750247	Klebsiella pneumoniae	573	38224	44316		6092	6092
CP059891	1886974840	Klebsiella pneumoniae subsp. pneumoniae	72407	31268	37360		6092	6092
JN233704	359730342	Klebsiella pneumoniae	573	12075	18167		6092	6092
JX442974	514883663	Klebsiella pneumoniae	573	109834	115926		6092	6092
KF719971	575010309	Klebsiella pneumoniae	573	8650	14742		6092	6092
LM994717	674651793	Klebsiella pneumoniae	573	31830	37922		6092	6092
LR025089	1563689451	Klebsiella pneumoniae	573	130638	136730		6092	6092
LR607360	1700446165	Klebsiella pneumoniae	573	5682325	5688417		6092	6092
LR607368	1700446173	Klebsiella pneumoniae	573	5730550	5736642		6092	6092
LT009688	1035427607	Klebsiella pneumoniae	573	9436	15528		6092	6092
LT216439	1028614555	Klebsiella pneumoniae	573	2722	8814		6092	6092
MF135602	1214980348	Klebsiella pneumoniae	573	2869	8961		6092	6092
MF918373	1315519988	Klebsiella pneumoniae	573	57811	63903		6092	6092
MK192097	1559986265	Klebsiella pneumoniae	573	112844	118936		6092	6092
MN823997	1830578695	Klebsiella pneumoniae	573	70753	76845		6092	6092
MN823998	1826686080	Klebsiella pneumoniae	573	108059	114151		6092	6092
MN823999	1826686279	Klebsiella pneumoniae	573	8525	14617		6092	6092
CP000648	150958208	Klebsiella pneumoniae subsp. pneumoniae MGH 78578	272620	43556	49647		6091	6091
CP031369	1657805823	Klebsiella pneumoniae	573	285986	292077		6091	6091
CP027696	1444868603	Klebsiella pneumoniae	573	45396	51486		6090	6090
AP012055	493665175	Klebsiella pneumoniae subsp. pneumoniae KPX	990925	153752	147663		-6089	6089
CP011987	902618894	Klebsiella pneumoniae UHKPC07	1284804	26882	20793		-6089	6089
CP014121	1345506252	Klebsiella pneumoniae	573	195364	189275		-6089	6089
CP014649	1036435769	Klebsiella pneumoniae	573	131566	125477		-6089	6089
CP015132	1036566682	Klebsiella pneumoniae	573	182423	176334		-6089	6089
CP015386	1132363659	Klebsiella pneumoniae	573	65864	59775		-6089	6089
CP015393	1132369513	Klebsiella pneumoniae	573	30312	24223		-6089	6089
CP015823	1052520069	Klebsiella pneumoniae	573	54403	48314		-6089	6089
CP018351	1114563435	Klebsiella pneumoniae	573	89476	83387		-6089	6089
CP018441	1114614970	Klebsiella pneumoniae	573	46617	40528		-6089	6089
CP018675	1120774237	Klebsiella pneumoniae	573	106740	100651		-6089	6089
CP018886	1338613339	Klebsiella pneumoniae subsp. pneumoniae	72407	73394	67305		-6089	6089
CP020072	1163063310	Klebsiella pneumoniae	573	23643	17554		-6089	6089
CP020838	1196607887	Klebsiella pneumoniae	573	214587	208498		-6089	6089
CP021540	1202217371	Klebsiella pneumoniae	573	42130	36041		-6089	6089
CP021544	1202218344	Klebsiella pneumoniae	573	31486	25397		-6089	6089
CP021710	1202265113	Klebsiella pneumoniae	573	37134	31045		-6089	6089
CP021713	1202265498	Klebsiella pneumoniae	573	158070	151981		-6089	6089
CP021752	1206198477	Klebsiella pneumoniae	573	152241	146152		-6089	6089
CP021834	1207891990	Klebsiella pneumoniae	573	119109	113020		-6089	6089
CP022145	1213430673	Klebsiella pneumoniae	573	63462	57373		-6089	6089
CP022574	1229081927	Klebsiella pneumoniae	573	153998	147909		-6089	6089
CP022692	1776325381	Klebsiella pneumoniae subsp. pneumoniae	72407	63732	57643		-6089	6089
CP023442	1395875844	Klebsiella pneumoniae	573	80845	74756		-6089	6089
CP023488	1269247918	Klebsiella pneumoniae subsp. pneumoniae	72407	114629	108540		-6089	6089
CP023912	1266971690	Klebsiella pneumoniae	573	107095	101006		-6089	6089
CP024193	1273289664	Klebsiella pneumoniae	573	63732	57643		-6089	6089
CP024523	1274842551	Klebsiella pneumoniae	573	63732	57643		-6089	6089
CP024530	1274848122	Klebsiella pneumoniae	573	63732	57643		-6089	6089
CP024537	1274853625	Klebsiella pneumoniae	573	63732	57643		-6089	6089
CP024551	1274874908	Klebsiella pneumoniae	573	63732	57643		-6089	6089
CP024558	1274880965	Klebsiella pneumoniae	573	63732	57643		-6089	6089
CP024565	1274886501	Klebsiella pneumoniae	573	63732	57643		-6089	6089
CP024572	1274894403	Klebsiella pneumoniae	573	63732	57643		-6089	6089
CP025006	1293078498	Klebsiella pneumoniae	573	63780	57691		-6089	6089
CP025009	1293084024	Klebsiella pneumoniae	573	63782	57693		-6089	6089
CP025817	1329999103	Klebsiella pneumoniae	573	57399	51310		-6089	6089
CP026135	1564237720	Klebsiella pneumoniae	573	245	6334		6089	6089
CP026151	1564260200	Klebsiella pneumoniae	573	113523	107434		-6089	6089
CP027161	1353857240	Klebsiella pneumoniae	573	101106	95017		-6089	6089
CP028181	1373202192	Klebsiella pneumoniae	573	11022	4933		-6089	6089
CP028543	1378038611	Klebsiella pneumoniae subsp. pneumoniae	72407	63732	57643		-6089	6089
CP028781	1723902788	Klebsiella pneumoniae subsp. pneumoniae	72407	63732	57643		-6089	6089
CP029101	1384457924	Klebsiella pneumoniae	573	90680	84591		-6089	6089
CP029387	1390430426	Klebsiella pneumoniae subsp. pneumoniae	72407	63732	57643		-6089	6089
CP029588	1393931399	Klebsiella pneumoniae	573	59790	53701		-6089	6089
CP031735	1464433914	Klebsiella pneumoniae subsp. pneumoniae	72407	64771	58682		-6089	6089
CP032209	1476628270	Klebsiella pneumoniae	573	130105	124016		-6089	6089
CP033402	1509151960	Klebsiella pneumoniae	573	63732	57643		-6089	6089
CP033627	1517371171	Klebsiella pneumoniae	573	64678	58589		-6089	6089
CP033774	1518971120	Klebsiella pneumoniae	573	138770	132681		-6089	6089
CP036302	1584047837	Klebsiella pneumoniae subsp. pneumoniae	72407	63732	57643		-6089	6089
CP036337	1583987743	Klebsiella pneumoniae	573	186933	180844		-6089	6089
CP037929	1796481170	Klebsiella pneumoniae subsp. pneumoniae	72407	63732	57643		-6089	6089
CP039796	1805558688	Klebsiella pneumoniae	573	63733	57644		-6089	6089
CP039809	1805570512	Klebsiella pneumoniae	573	63732	57643		-6089	6089
CP039814	1805576043	Klebsiella pneumoniae	573	43247	37158		-6089	6089
CP039969	1634541605	Klebsiella pneumoniae	573	63905	57816		-6089	6089
CP039975	1634547141	Klebsiella pneumoniae	573	162460	156371		-6089	6089
CP041084	1692920410	Klebsiella pneumoniae	573	66012	59923		-6089	6089
CP041100	1700946107	Klebsiella pneumoniae subsp. pneumoniae	72407	64949	58860		-6089	6089
CP042883	1848944497	Klebsiella pneumoniae	573	63405	57316		-6089	6089
CP043970	1747866865	Klebsiella pneumoniae	573	139199	133110		-6089	6089
CP047337	1817351882	Klebsiella pneumoniae	573	90948	84859		-6089	6089
CP049717	1870131312	Klebsiella pneumoniae	573	63732	57643		-6089	6089
CP049720	1870136813	Klebsiella pneumoniae	573	63732	57643		-6089	6089
CP052168	1837523424	Klebsiella pneumoniae	573	63732	57643		-6089	6089
CP052218	1837612351	Klebsiella pneumoniae	573	63732	57643		-6089	6089
CP052245	1837047590	Klebsiella pneumoniae	573	63732	57643		-6089	6089
CP052401	1837235424	Klebsiella pneumoniae	573	63732	57643		-6089	6089
CP052405	1837224217	Klebsiella pneumoniae	573	63732	57643		-6089	6089
CP052408	1837122285	Klebsiella pneumoniae	573	63732	57643		-6089	6089
CP052415	1837213224	Klebsiella pneumoniae	573	63732	57643		-6089	6089
CP052435	1837240863	Klebsiella pneumoniae	573	63732	57643		-6089	6089
CP052477	1837279621	Klebsiella pneumoniae	573	63732	57643		-6089	6089
CP052620	1837398870	Klebsiella pneumoniae	573	63732	57643		-6089	6089
CP052628	1837355606	Klebsiella pneumoniae	573	63732	57643		-6089	6089
CP052636	1837404542	Klebsiella pneumoniae	573	63732	57643		-6089	6089
CP052655	1837410075	Klebsiella pneumoniae	573	64932	58843		-6089	6089
CP052672	1837421024	Klebsiella pneumoniae	573	72997	66908		-6089	6089
CP052680	1837432077	Klebsiella pneumoniae	573	63732	57643		-6089	6089
CP052699	1837426544	Klebsiella pneumoniae	573	63732	57643		-6089	6089
CP052738	1837454389	Klebsiella pneumoniae	573	63732	57643		-6089	6089
CP053767	1867229129	Klebsiella pneumoniae	573	68734	62645		-6089	6089
CP056025	1863082990	Klebsiella pneumoniae	573	64926	58837		-6089	6089
CP056879	1880818599	Klebsiella pneumoniae	573	63732	57643		-6089	6089
CP056884	1880823842	Klebsiella pneumoniae	573	63732	57643		-6089	6089
KT203286	937637950	Klebsiella pneumoniae	573	201751	195662		-6089	6089
LR025093	1563695264	Klebsiella pneumoniae	573	166899	160810		-6089	6089
LR130542	1552475656	Klebsiella pneumoniae	573	63732	57643		-6089	6089
LR130549	1552475663	Klebsiella pneumoniae	573	63732	57643		-6089	6089
LR697123	1721134140	Klebsiella pneumoniae	573	63732	57643		-6089	6089
LT985229	1360511224	Escherichia coli	562	207791	201702		-6089	6089
LT994840	1417734919	Klebsiella pneumoniae	573	154240	148151		-6089	6089
MF150084	1227855103	Klebsiella pneumoniae	573	65849	59760		-6089	6089
MK181633	1559985733	Klebsiella pneumoniae	573	308690	302601		-6089	6089
MN824000	1830578931	Klebsiella pneumoniae	573	73496	67407		-6089	6089
MN842293	1826683931	Klebsiella pneumoniae	573	69069	62980		-6089	6089
MN922301	1799128257	Klebsiella pneumoniae	573	63732	57643		-6089	6089
CP019773	1150468531	Klebsiella pneumoniae subsp. pneumoniae	72407	19386	13298		-6088	6088
CP031583	1450480539	Klebsiella pneumoniae	573	152534	146446		-6088	6088
LR134222	1539581788	Escherichia coli	562	4672928	4666841		-6087	6087
CP020838	1196607887	Klebsiella pneumoniae	573	10313	4229		-6084	6084
AP022228	1877580408	Enterobacter cloacae	550	3216391	3222474		6083	6083
CP012162	910286592	Enterobacter roggenkampii	1812935	3408046	3414129		6083	6083
CP012994	959153907	Klebsiella pneumoniae	573	95736	101819		6083	6083
CP021958	1208676396	Klebsiella pneumoniae	573	93297	99380		6083	6083
CP023978	1464630695	Klebsiella variicola	244366	16088	22171		6083	6083
CP026197	1335978696	Enterobacteriaceae bacterium ENNIH3	1920128	5114311	5120394		6083	6083
CP032173	1476628573	Klebsiella pneumoniae	573	26863	32946		6083	6083
CP032897	1491881166	Enterobacter kobei	208224	4225966	4232049		6083	6083
CP041645	1707199574	Klebsiella pneumoniae	573	35209	41292		6083	6083
CP050073	1823117422	Enterobacter kobei	208224	3359155	3365238		6083	6083
CP001918	295054830	Enterobacter cloacae subsp. cloacae ATCC 13047	716541	3775908	3781990		6082	6082
CP021567	1548969480	unidentified plasmid	45202	60363	66445		6082	6082
CP056716	1880510307	Enterobacter asburiae	61645	3289584	3295666		6082	6082
LR134223	1539586470	Klebsiella aerogenes	548	361041	354959		-6082	6082
AP022058	1877403106	Klebsiella sp. WP4-W18-ESBL-05	2675713	69728	63648		-6080	6080
CP004091	449096568	Cronobacter sakazakii SP291	956149	910808	904728		-6080	6080
CP011591	828922166	Enterobacter asburiae	61645	4526557	4520477		-6080	6080
CP012253	924297859	Cronobacter sakazakii	28141	889007	882927		-6080	6080
CP012989	959148169	Klebsiella pneumoniae	573	14165	8085		-6080	6080
CP025683	1554455422	Klebsiella pneumoniae	573	79738	73658		-6080	6080
CP026192	1335958703	Enterobacteriaceae bacterium ENNIH2	1920109	3020506	3014426		-6080	6080
CP034362	1818854483	Klebsiella pneumoniae	573	77903	71823		-6080	6080
CP037442	1590863517	Klebsiella sp. PO552	1972757	48017	41937		-6080	6080
CP055333	1878738632	Klebsiella quasipneumoniae	1463165	79905	73825		-6080	6080
CP056129	1879675521	Enterobacter roggenkampii	1812935	1381758	1375678		-6080	6080
CP056298	1879787675	Klebsiella pneumoniae	573	72182	66102		-6080	6080
CP056475	1879892845	Enterobacter cloacae	550	81138	75058		-6080	6080
LR607373	1700446178	Klebsiella pneumoniae	573	5561093	5555013		-6080	6080
CP056776	1863510090	Enterobacter cloacae	550	3324407	3318328		-6079	6079
CP052489	1837133245	Klebsiella pneumoniae	573	63794	57729		-6065	6065
CP024875	1373495841	Klebsiella pneumoniae	573	1	5708		5707	5707
LT968712	1518649228	Klebsiella pneumoniae	573	1	5552		5551	5551
CP050323	1854623666	Pseudomonas aeruginosa	287	2154882	2149564		-5318	5318
CP012884	940656394	Klebsiella pneumoniae KP-1	1365186	175876	181059		5183	5183
CP041640	1720100036	Klebsiella pneumoniae	573	39	5144		5105	5105
CP054304	1851199349	Klebsiella pneumoniae	573	177288	172283		-5005	5005
CP021133	1190843182	Pseudomonas fragi	296	1	4478		4477	4477
CP030071	1717372679	Klebsiella pneumoniae	573	185511	181526		-3985	3985
CP056677	1879951186	Enterobacter hormaechei	158836	90005	86159		-3846	3846
AP022869	1823812328	Halomonas meridiana	29570	1893233	1897022		3789	3789
AP022821	1818168464	Halomonas meridiana	29570	2979724	2983512		3788	3788
CP029140	1384500559	Klebsiella michiganensis	1134687	110063	113849		3786	3786
CP048413	1886566328	Klebsiella pneumoniae	573	261630	265416		3786	3786
AP019517	1707062289	Halomonas axialensis	115555	1191489	1187708		-3781	3781
CP023554	1269242179	Klebsiella pneumoniae subsp. pneumoniae	72407	207659	211436		3777	3777
CP030066	1717367395	Klebsiella pneumoniae	573	90459	86694		-3765	3765
CP033745	1519055530	Burkholderia multivorans	87883	188671	185161		-3510	3510
CP023935	1266994041	Klebsiella pneumoniae	573	2968	1		-2967	2967
CP028569	1377522623	Acinetobacter pittii	48296	95877	98842		2965	2965
CP023641	1250071859	Pseudomonas mendocina	300	3049400	3046610		-2790	2790
CP002881	338799449	Pseudomonas stutzeri	316	2411465	2408683		-2782	2782
CP027664	1364830652	Pseudomonas stutzeri	316	3323740	3326519		2779	2779
AJ519722	37518395	Yersinia enterocolitica	630	39665	37087		-2578	2578
CP012606	1033683238	Ralstonia insidiosa	190721	670777	673355		2578	2578
AP018724	1496472133	Sulfurivermis fontis	1972068	960680	963244		2564	2564
CP049357	1819261009	Deinococcus wulumuqiensis R12	1288484	783578	786094		2516	2516
CP030071	1717372679	Klebsiella pneumoniae	573	2121	1		-2120	2120
CP000760	151563660	Ochrobactrum anthropi ATCC 49188	439375	15820	17900		2080	2080
CP001511	240011718	Methylorubrum extorquens AM1	272630	871310	873390		2080	2080
CP050899	1829846926	Rhizobium pusense	648995	1052923	1050843		-2080	2080
CP008817	674005394	Ochrobactrum anthropi	529	77588	79662		2074	2074
CP033769	1518966189	Acinetobacter baumannii	470	96764	94800		-1964	1964
CP024459	1274930520	Klebsiella pneumoniae	573	60140	58209		-1931	1931
CP029140	1384500559	Klebsiella michiganensis	1134687	161	2092		1931	1931
MN543573	1843787215	Klebsiella pneumoniae	573	61857	59926		-1931	1931
CP048413	1886566328	Klebsiella pneumoniae	573	1	1860		1859	1859
CP023554	1269242179	Klebsiella pneumoniae subsp. pneumoniae	72407	1	1425		1424	1424
CP041640	1720100036	Klebsiella pneumoniae	573	221382	222301		919	919
